1 **Detection of phylogenetic core groups in diverse microbial**  
2 **ecosystems**

3 Marcos Parras-Moltó<sup>1</sup>, Daniel Aguirre de Cárcer<sup>1\*</sup>

4 <sup>1</sup>Departamento de Biología, Universidad Autónoma de Madrid, Madrid, Spain.

5

6 **Correspondence:**

7 Dr. Daniel Aguirre de Cárcer

8 daniel.aguirre@uam.es

9

10 **Keywords:**

11 Community assembly, microbiome, Phylogenetic clustering, 16S rRNA gene

12

13

14

15

16

17

18

19

20

21

22

23

24

25

26

27

28

29 ABSTRACT

30 The detection and subsequent analysis of phylogenetic core groups (PCGs) in a  
31 microbial ecosystem has been recently proposed as a potentially important analytical  
32 framework with which to increase our understanding of its structure and function.  
33 However, it was still unclear whether PCGs represented an infrequent phenomenon in  
34 nature. Here we provide evidence of PCGs in a large and diverse array of environments,  
35 which seems to indicate that their existence is indeed a predominant feature of microbial  
36 ecosystems. Moreover, we offer dedicated scripts to examine the presence and  
37 characteristics of PCGs in other microbial community datasets.

38

39

40

41

42

43

44

45

46

47

48

49

50

51

52

53

54

55

56

57

58

59

60 **Background.** It is nowadays commonly believed that microbial communities assemble  
61 on the basis of function alone. This idea is supported by the predominant observation  
62 that different community compositions can translate into functionally-equivalent  
63 microbial ecosystems. In this model, multiple unrelated populations would be  
64 functionally redundant [1] in a particular microbial ecosystem type. However, this idea  
65 is somewhat challenged by the extended phenomenon of phylogenetic clustering in  
66 microbial communities; the tendency of bacteria to co-occur with phylogenetically  
67 related populations more often than expected by chance alone [2, 3].

68 Phylogenetic clustering in a microbial ecosystem can be studied in terms of  
69 phylogenetic core groups (PCGs), representing discrete portions of the bacterial  
70 phylogeny present in all instances of a given ecosystem type. PCGs have been detected  
71 so far in the rice rhizosphere [4] and human gut (fecal) [5] environments. The existence  
72 of a PCG in a particular microbial ecosystem type has been theorized to be linked to  
73 selection based on a combination of biotic and abiotic factors characteristic of that  
74 ecosystem, and the existence in populations belonging to that PCG of a  
75 phylogenetically-conserved set of traits allowing them to surpass such selection [4].  
76 Thus, the study of PCGs in a given ecosystem could help understand the selection  
77 forces at play in the ecosystem, and thus illuminate overall community assembly and  
78 function.

79 It is still unclear whether PCGs are a predominant feature of microbial ecosystems or a  
80 rare phenomenon. Thus, to test these possibilities we evaluate here the existence of  
81 PCGs in a wide array of diverse microbial ecosystems. Also, so far PCGs had been  
82 detected in terms of 16S sequence clusters of varying depth, which represents a  
83 reasonable proxy. However, sequence clustering lacks true transitivity, which, jointly  
84 with differential initial seeding between clustering runs, may translate into slightly  
85 different clusters for the same input dataset generated by different runs or clustering  
86 algorithms. Thus, here we analyze PCGs also on the basis of nodes in a phylogenetic  
87 tree detected in all instances of the ecosystem type, an approach that also provides  
88 increased phylogenetic resolution.

89 **Methods.** Here we analyze the existence of PCGs in nine different datasets from the  
90 literature presenting a comparatively high number of ecosystem replicates and  
91 sequencing depth (Table 1); The human microbiome is represented by datasets  
92 *FlemishGut* [6] (fecal), *TwinsUK* [7] (fecal), *Illeum* [8] (mucosa), *Rectum* [8] (mucosa),  
93 and *Vagina* [9] (mucosa). Plant-associated environments are represented by *Rice* (root  
94 samples) [10] and *Leaf* [11], animal microbiomes by *Sponge* (*Carteriospongia*  
95 *foliascens*) [12] and *Mice* [13], and environmental communities by *Wastewater* [14].  
96 *Rice* was further subdivided by root environment (rhizosphere, rhizoplane, and  
97 endosphere), *Mice* by origin (wild or lab), and *Vagina* in terms of previously reported  
98 community types [9].

99 For each dataset, samples presenting very low sequence depths were removed, then all  
100 samples were subsampled to a (minimum) common depth. Finally, the normalized  
101 datasets were analyzed with *BacterialCore.py* (<https://git.io/Je5V3>). The script uses  
102 various QIIME processes [15] and *R* libraries to detect PCGs and produce associated  
103 analyses and statistics. It employs the clustering-based core detection approach  
104 previously described [5], and a new approach based on a 16S rRNA gene phylogeny.  
105 Here, the algorithm traverses the tree from leaves to root; if a leaf/node is present in a

106 (selected) percentage of samples it is flagged as “core”, and its abundance values  
107 removed from all parental nodes before continuing, so that reported core groups are  
108 non-overlapping. Additionally, *BacterialCore.py* provides per core-group information,  
109 statistics, and consensus taxonomies.

110 **Results and discussion.** The microbial ecosystems analyzed presented a considerable  
111 number of PCGs detected at different phylogenetic depths along the bacterial phylogeny  
112 (Table 1, Figure 1, Suppl. Mat. 1, Suppl. Mat. 2). The exceptions to this pattern were  
113 the mucosa environments analyzed (*Illeum*, *Rectum*, and *Vagina*) as well as the *Leaf*  
114 ecosystem, featuring the presence of very few PCGs. This phenomenon could be  
115 hypothesized to relate to the more homogeneous abiotic conditions of these  
116 environments translating to less diverse communities. However, the *Rice rhizoplane* and  
117 *endosphere* ecosystems, which could also be *a priori* considered as presenting more  
118 homogeneous abiotic conditions, presented a large number of PCGs. The low number of  
119 PCGs detected in the mucosal ecosystems could be related to their comparatively low  
120 sequencing depth. Nevertheless, the leaf environment presents a substantial sequencing  
121 depth, but only two PCGs.

122 Overall, the detected PCGs represented a preeminent fraction of the total community  
123 (Table 1), with the lowest pooled abundance values being 18.5% (*Leaf*) and 34.9%  
124 (*Illeum*), and the largest 77.6% (*Sponge*) and 93.4% (*Vagina*). In general, there was a  
125 good correspondence between the clustering and tree-based approaches (Figure 1,  
126 Supplementary Material 2), both of which produced correlated results in terms of  
127 number of PCGs and their phylogenetic depth. Commonly, results for the clustering  
128 approach represented a subset of those from the tree-based approach (Supplementary  
129 Material 1; Venn diagrams)

130 In this brief report we have detected PCGs in terms of 16S sequence clusters and nodes  
131 in a phylogenetic tree of different depths present in all samples from the same  
132 ecosystem type. While this is a useful heuristic, other criteria such as a Poisson  
133 distribution [16], a competitive lottery schema [17], invariance metrics [18], or the use  
134 of neutral models [19, 20], could be employed and implemented within  
135 *BacterialCore.py*.

136 **Conclusion.** The use of observed phylogenetic clustering patterns of community  
137 assembly may represent an important clue to understand the assembly and function of a  
138 microbial ecosystem. Here we provide evidence of PCGs in a large and diverse array of  
139 environments, which seems to indicate that their existence is indeed a predominant  
140 feature of microbial ecosystems. Moreover, we offer dedicated scripts to examine the  
141 presence and characteristics of PCGs in other microbial community datasets.

142

#### 143 **Availability of data:**

144 The datasets analyzed during the current study are available from their original sources.  
145 Additional result files and scripts are available from the corresponding author upon  
146 request.

147

#### 148 **Acknowledgements**

149 This work was funded by the Spanish Ministry of Science and Innovation grant  
150 BIO2016-80101-R.

151

152

153

154 REFERENCES

- 155 1. Adair KL, Douglas AE. Making a microbiome: the many determinants of host-  
156 associated microbial community composition. *Curr Opin Microbiol.* 2017;35:23-9.
- 157 2. Stegen JC, Lin X, Konopka AE, Fredrickson JK. Stochastic and deterministic assembly  
158 processes in subsurface microbial communities. *The Isme Journal.* 2012;6:1653.
- 159 3. Horner-Devine MC, Bohannan BJ. Phylogenetic clustering and overdispersion in  
160 bacterial communities. *Ecology.* 2006;87:S100-8.
- 161 4. Aguirre de Cárcer D. A conceptual framework for the phylogenetically constrained  
162 assembly of microbial communities. *Microbiome.* 2019;7:142.
- 163 5. Aguirre de Cárcer D. The human gut pan-microbiome presents a compositional core  
164 formed by discrete phylogenetic units. *Scientific Reports.* 2018;8:14069.
- 165 6. Falony G, Joossens M, Vieira-Silva S, Wang J, Darzi Y, Faust K *et al.* Population-level  
166 analysis of gut microbiome variation. *Science.* 2016;352:560-4.
- 167 7. Goodrich JK, Davenport ER, Beaumont M, Jackson MA, Knight R, Ober C *et al.* Genetic  
168 Determinants of the Gut Microbiome in UK Twins. *Cell Host Microbe.* 2016;19:731-  
169 43.
- 170 8. Gevers D, Kugathasan S, Denson LA, Vazquez-Baeza Y, Van Treuren W, Ren B *et al.*  
171 The treatment-naive microbiome in new-onset Crohn's disease. *Cell Host Microbe.*  
172 2014;15:382-92.
- 173 9. Ravel J, Gajer P, Abdo Z, Schneider GM, Koenig SSK, McCulle SL *et al.* Vaginal  
174 microbiome of reproductive-age women. *Proceedings of the National Academy of  
175 Sciences.* 2011;108:4680-7.
- 176 10. Edwards J, Johnson C, Santos-Medellín C, Lurie E, Podishetty NK, Bhatnagar S *et al.*  
177 Structure, variation, and assembly of the root-associated microbiomes of rice.  
178 *Proceedings of the National Academy of Sciences.* 2015;112:E911.
- 179 11. Wagner MR, Lundberg DS, Del Rio TG, Tringe SG, Dangl JL, Mitchell-Olds T. Host  
180 genotype and age shape the leaf and root microbiomes of a wild perennial plant. *Nat  
181 Commun.* 2016;7.
- 182 12. Moitinho-Silva L, Nielsen S, Amir A, Gonzalez A, Ackermann GL, Cerrano C *et al.* The  
183 sponge microbiome project. *Gigascience.* 2017;6:1-7.
- 184 13. Rosshart SP, Vassallo BG, Angeletti D, Hutchinson DS, Morgan AP, Takeda K *et al.*  
185 Wild Mouse Gut Microbiota Promotes Host Fitness and Improves Disease Resistance.  
186 *Cell.* 2017;171:1015-28.e13.
- 187 14. Saunders AM, Albertsen M, Vollertsen J, Nielsen PH. The activated sludge ecosystem  
188 contains a core community of abundant organisms. *ISME J.* 2016;10:11-20.
- 189 15. Caporaso JG, Kuczynski J, Stombaugh J, Bittinger K, Bushman FD, Costello EK *et al.*  
190 QIIME allows analysis of high-throughput community sequencing data. *Nat Meth.*  
191 2010;7:335-6.
- 192 16. Gumiere T, Meyer K, Burns A, Gumiere S, Bohannan B, Andreote F: A probabilistic  
193 model to identify the core microbial community; 2018.
- 194 17. Verster AJ, Borenstein E. Competitive lottery-based assembly of selected clades in  
195 the human gut microbiome. *Microbiome.* 2018;6:186.
- 196 18. Bradley PH, Pollard KS. Proteobacteria explain significant functional variability in the  
197 human gut microbiome. *Microbiome.* 2017;5:017-0244.
- 198 19. Harris K, Parsons TL, Ijaz UZ, Lahti L, Holmes I, Quince C. Linking Statistical and  
199 Ecological Theory: Hubbell's Unified Neutral Theory of Biodiversity as a  
200 Hierarchical Dirichlet Process. *Proceedings of the IEEE.* 2017;105:516-29.
- 201 20. Adair KL, Wilson M, Bost A, Douglas AE. Microbial community assembly in wild  
202 populations of the fruit fly *Drosophila melanogaster*. *The Isme Journal.* 2018;12:959-  
203 72.

204

205 TABLES

**Table 1. PCGs in diverse ecosystems**

| Dataset            | Samples | Depth  | Frequency | Core groups per clust. threshold                                                                                                                                                                                                                                                                                                                                                                                                    |
|--------------------|---------|--------|-----------|-------------------------------------------------------------------------------------------------------------------------------------------------------------------------------------------------------------------------------------------------------------------------------------------------------------------------------------------------------------------------------------------------------------------------------------|
| FlemishGut         | 873     | 8,383  | 0.50±0.13 | 97 <sup>2</sup> , 95 <sup>1</sup> , 93 <sup>1</sup> , 92 <sup>1</sup> , 90 <sup>1</sup> , 89 <sup>3</sup> , 88 <sup>3</sup> , 86 <sup>3</sup> , 84 <sup>1</sup> , 82 <sup>1</sup> , 77 <sup>1</sup>                                                                                                                                                                                                                                 |
| TwinsUK            | 2,727   | 14,082 | 0.37±0.11 | 90 <sup>2</sup> , 89 <sup>1</sup> , 88 <sup>1</sup> , 86 <sup>1</sup> , 83 <sup>2</sup> , 81 <sup>1</sup> , 77 <sup>1</sup>                                                                                                                                                                                                                                                                                                         |
| Illeum             | 429     | 3,624  | 0.34±0.17 | 84 <sup>1</sup> , 81 <sup>1</sup>                                                                                                                                                                                                                                                                                                                                                                                                   |
| Rectum             | 304     | 3,763  | 0.42±0.18 | 86 <sup>1</sup> , 79 <sup>1</sup> , 75 <sup>1</sup>                                                                                                                                                                                                                                                                                                                                                                                 |
| Rice               | 372     | 16,884 | 0.43±0.20 | 97 <sup>□</sup> , 95 <sup>1</sup> , 90 <sup>1</sup> , 87 <sup>1</sup> , 86 <sup>1</sup> , 85 <sup>1</sup> , 84 <sup>1</sup> , 83 <sup>□</sup> , 82 <sup>□</sup> , 81 <sup>3</sup> , 80 <sup>3</sup> , 79 <sup>□</sup> , 78 <sup>3</sup> , 77 <sup>3</sup> , 76 <sup>2</sup> , 75 <sup>1</sup>                                                                                                                                       |
| Rice (Rhizosphere) | 125     | 16,884 | 0.50±0.03 | 97 <sup>□□</sup> , 96 <sup>□</sup> , 95 <sup>□</sup> , 94 <sup>□</sup> , 93 <sup>□</sup> , 92 <sup>□</sup> , 91 <sup>□</sup> , 90 <sup>□</sup> , 89 <sup>1°</sup> , 88 <sup>1□</sup> , 87 <sup>1□</sup> , 86 <sup>1□</sup> , 85 <sup>□</sup> , 84 <sup>1□</sup> , 83 <sup>12</sup> , 82 <sup>□</sup> , 81 <sup>□</sup> , 80 <sup>□</sup> , 79 <sup>13</sup> , 78 <sup>□</sup> , 77 <sup>□</sup> , 76 <sup>□</sup> , 75 <sup>1</sup> |
| Rice (Endosphere)  | 133     | 17,735 | 0.70±0.15 | 97 <sup>1□</sup> , 96 <sup>1</sup> , 95 <sup>1</sup> , 92 <sup>1</sup> , 91 <sup>1</sup> , 90 <sup>1</sup> , 88 <sup>1</sup> , 87 <sup>2</sup> , 86 <sup>3</sup> , 85 <sup>2</sup> , 84 <sup>2</sup> , 83 <sup>1</sup> , 82 <sup>□</sup> , 81 <sup>□</sup> , 80 <sup>2</sup> , 79 <sup>2</sup> , 78 <sup>2</sup> , 77 <sup>2</sup> , 76 <sup>2</sup> , 75 <sup>3</sup>                                                              |
| Rice (Rhizoplane)  | 114     | 17,821 | 0.54±0.09 | 97 <sup>33</sup> , 96 <sup>□</sup> , 95 <sup>3</sup> , 94 <sup>3</sup> , 93 <sup>3</sup> , 92 <sup>□</sup> , 91 <sup>□</sup> , 90 <sup>□</sup> , 89 <sup>2</sup> , 88 <sup>□</sup> , 87 <sup>11</sup> , 86 <sup>□</sup> , 85 <sup>□</sup> , 84 <sup>11</sup> , 83 <sup>1□</sup> , 82 <sup>□</sup> , 81 <sup>□</sup> , 80 <sup>□</sup> , 79 <sup>□</sup> , 78 <sup>□</sup> , 77 <sup>□</sup> , 76 <sup>1</sup> , 75 <sup>2</sup>     |
| Vagina (#1-3,5)    | 286     | 693    | 0.93±0.11 | 82 <sup>1</sup>                                                                                                                                                                                                                                                                                                                                                                                                                     |
| Vagina (#1)        | 105     | 693    | 0.80±0.19 | 97 <sup>1</sup>                                                                                                                                                                                                                                                                                                                                                                                                                     |
| Vagina (#2)        | 25      | 774    | 0.79±0.17 | 97 <sup>1</sup>                                                                                                                                                                                                                                                                                                                                                                                                                     |
| Vagina (#3)        | 135     | 1,271  | 0.85±0.13 | 97 <sup>1</sup>                                                                                                                                                                                                                                                                                                                                                                                                                     |
| Vagina (#4)        | 108     | 881    | NA        | NA                                                                                                                                                                                                                                                                                                                                                                                                                                  |
| Vagina (#5)        | 21      | 936    | 0.76±0.17 | 97 <sup>1</sup> , 95 <sup>1</sup>                                                                                                                                                                                                                                                                                                                                                                                                   |
| Wastewater         | 43      | 48,668 | 0.53±0.07 | 97 <sup>□□</sup> , 96 <sup>2</sup> , 95 <sup>2</sup> , 94 <sup>1</sup> , 93 <sup>□</sup> , 92 <sup>□</sup> , 91 <sup>□</sup> , 90 <sup>□</sup> , 89 <sup>□</sup> , 88 <sup>□</sup> , 87 <sup>□</sup> , 86 <sup>1□</sup> , 85 <sup>□</sup> , 84 <sup>□</sup> , 83 <sup>11</sup> , 82 <sup>3</sup> , 81 <sup>□</sup> , 8 <sup>3</sup> , 79 <sup>3</sup> , 78 <sup>□</sup> , 77 <sup>3</sup> , 76 <sup>□</sup> , 75 <sup>□</sup>       |
| Sponge             | 143     | 27,921 | 0.77±0.10 | 97 <sup>1°</sup> , 96 <sup>1</sup> , 93 <sup>1</sup> , 92 <sup>3</sup> , 91 <sup>1</sup> , 90 <sup>3</sup> , 89 <sup>1</sup> , 88 <sup>□</sup> , 87 <sup>□</sup> , 86 <sup>□</sup> , 85 <sup>1</sup> , 84 <sup>□</sup> , 83 <sup>2</sup> , 81 <sup>3</sup> , 80 <sup>3</sup> , 78 <sup>2</sup> , 76 <sup>1</sup>                                                                                                                    |
| Leaf               | 175     | 10,322 | 0.18±0.10 | 97 <sup>1</sup> , 91 <sup>1</sup>                                                                                                                                                                                                                                                                                                                                                                                                   |
| Mice (Total)       | 230     | 10,086 | 0.52±0.08 | 95 <sup>1</sup> , 92 <sup>1</sup> , 91 <sup>2</sup> , 91 <sup>1</sup> , 89 <sup>2</sup> , 88 <sup>3</sup> , 87 <sup>2</sup> , 86 <sup>2</sup> , 85 <sup>□</sup> , 84 <sup>□</sup> , 83 <sup>□</sup> , 82 <sup>□</sup> , 81 <sup>1</sup> , 80 <sup>1</sup> , 79 <sup>1</sup> , 78 <sup>1</sup>                                                                                                                                       |
| Mice (Lab)         | 129     | 15,932 | 0.51±0.10 | 97 <sup>21</sup> , 96 <sup>3</sup> , 95 <sup>2</sup> , 94 <sup>2</sup> , 93 <sup>2</sup> , 92 <sup>□</sup> , 91 <sup>1°</sup> , 90 <sup>1°</sup> , 89 <sup>□</sup> , 88 <sup>□</sup> , 87 <sup>□</sup> , 86 <sup>□</sup> , 85 <sup>3</sup> , 84 <sup>3</sup> , 83 <sup>□</sup> , 81 <sup>□</sup> , 80 <sup>3</sup> , 79 <sup>1</sup> , 78 <sup>1</sup>                                                                              |
| Mice (Wild)        | 101     | 10,086 | 0.57±0.07 | 97 <sup>3</sup> , 96 <sup>1</sup> , 93 <sup>1</sup> , 92 <sup>2</sup> , 90 <sup>2</sup> , 89 <sup>1</sup> , 88 <sup>2</sup> , 87 <sup>□</sup> , 86 <sup>□</sup> , 85 <sup>□</sup> , 84 <sup>2</sup> , 83 <sup>1</sup> , 82 <sup>1</sup> , 81 <sup>1</sup> , 79 <sup>1</sup> , 78 <sup>2</sup> , 77 <sup>1</sup> , 75 <sup>1</sup>                                                                                                   |

**Depth**; sequences per sample. **Frequency**; average pooled abundance of members of the core OTUs across the dataset. **Core groups per clust. threshold**; Numbers represent similarity clustering thresholds (x10<sup>-2</sup>) were core OTUs were detected, and superscript values indicate the number of such OTUs observed for each threshold.

206

207

208

209

210 FIGURE LEGENDS

211 **Figure 1. Detection of PCGs in datasets.** Results for selected datasets based on the  
212 dynamic clustering of 16S rRNA gene sequences from 97% to 75% sequence identity  
213 (right to left) [OTUs] and the phylogenetic tree-based approach [Tree]. For each  
214 threshold, OTUs/nodes present in all samples (i.e. core) appear vertically stacked with  
215 individual heights representing average relative abundance of each core OTU/node in  
216 the dataset. For the tree-based approach, x-axis values represent the maximum intra-  
217 node distance, not the average.  
218

219 SUPPLEMENTARY MATERIALS

220 **Supplementary Material 1.** *BacterialCore.py* result files (intermediate clustering  
221 files have been omitted due to their large size).

222 **Supplementary Material 2.** Detection of PCGs in datasets. Results based on the  
223 dynamic clustering of 16S rRNA gene sequences from 97% to 75% sequence identity  
224 (right to left) [Page 1; OTUs], and the phylogenetic tree-based approach where x-axis  
225 values represent the maximum intra-node distance [Page 2; MaxS] or the average intra-  
226 node distance [Page3; MeanS]. For each threshold, OTUs/nodes present in all samples  
227 (i.e. core) appear vertically stacked with individual heights representing average relative  
228 abundance of each core OTU/node in the dataset. Results arising from both approaches  
229 are also compared [Pages 4-5].  
230

231

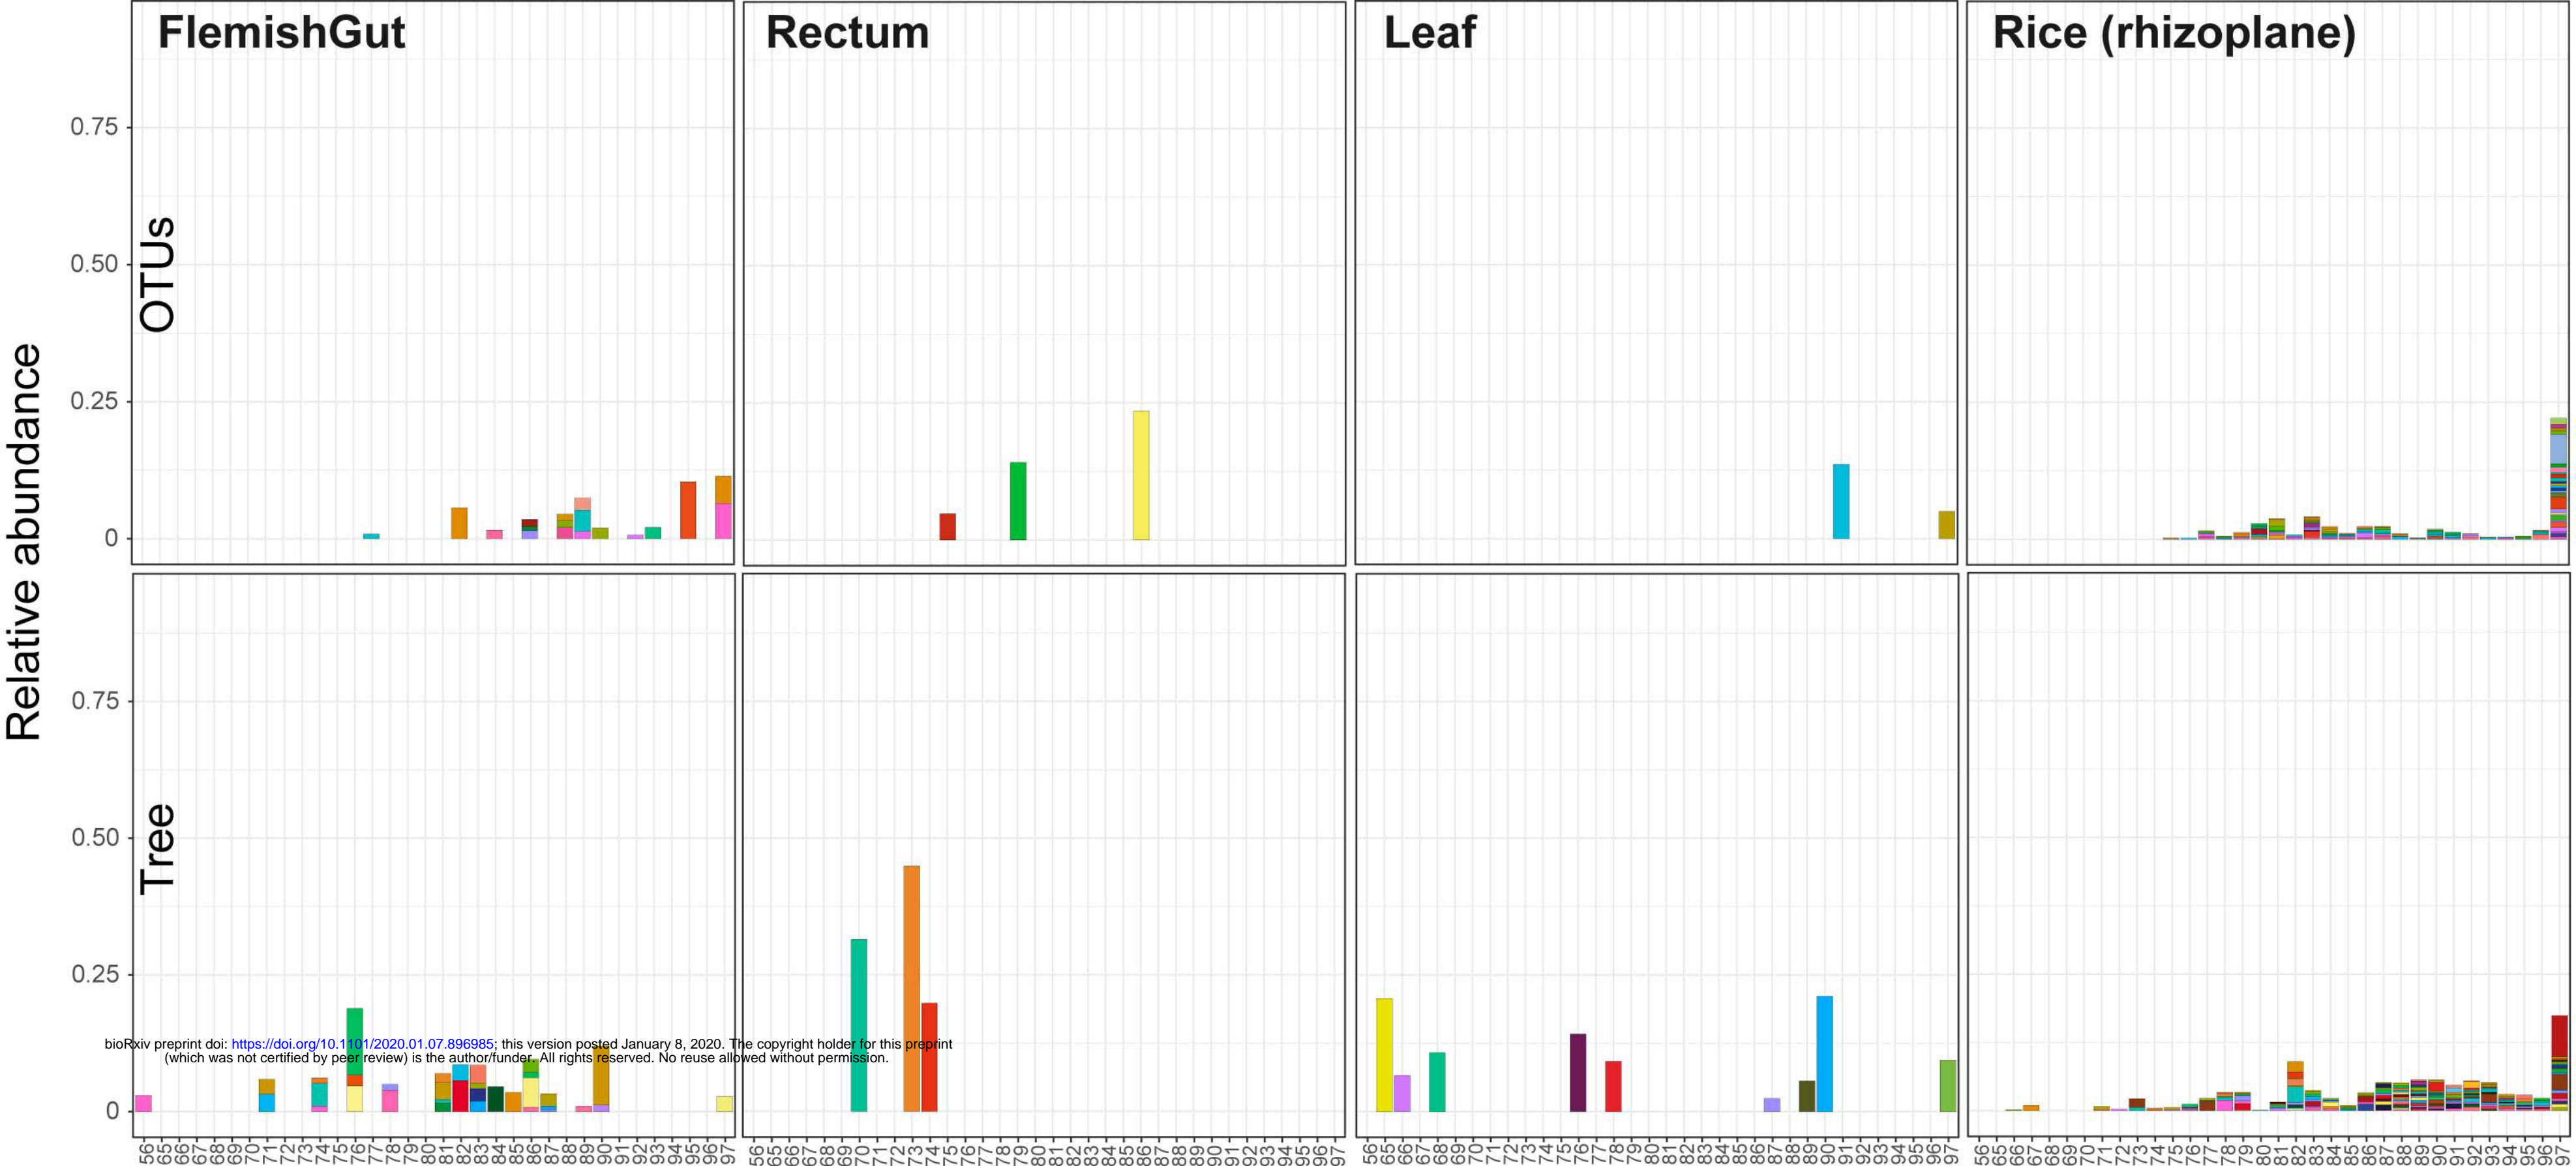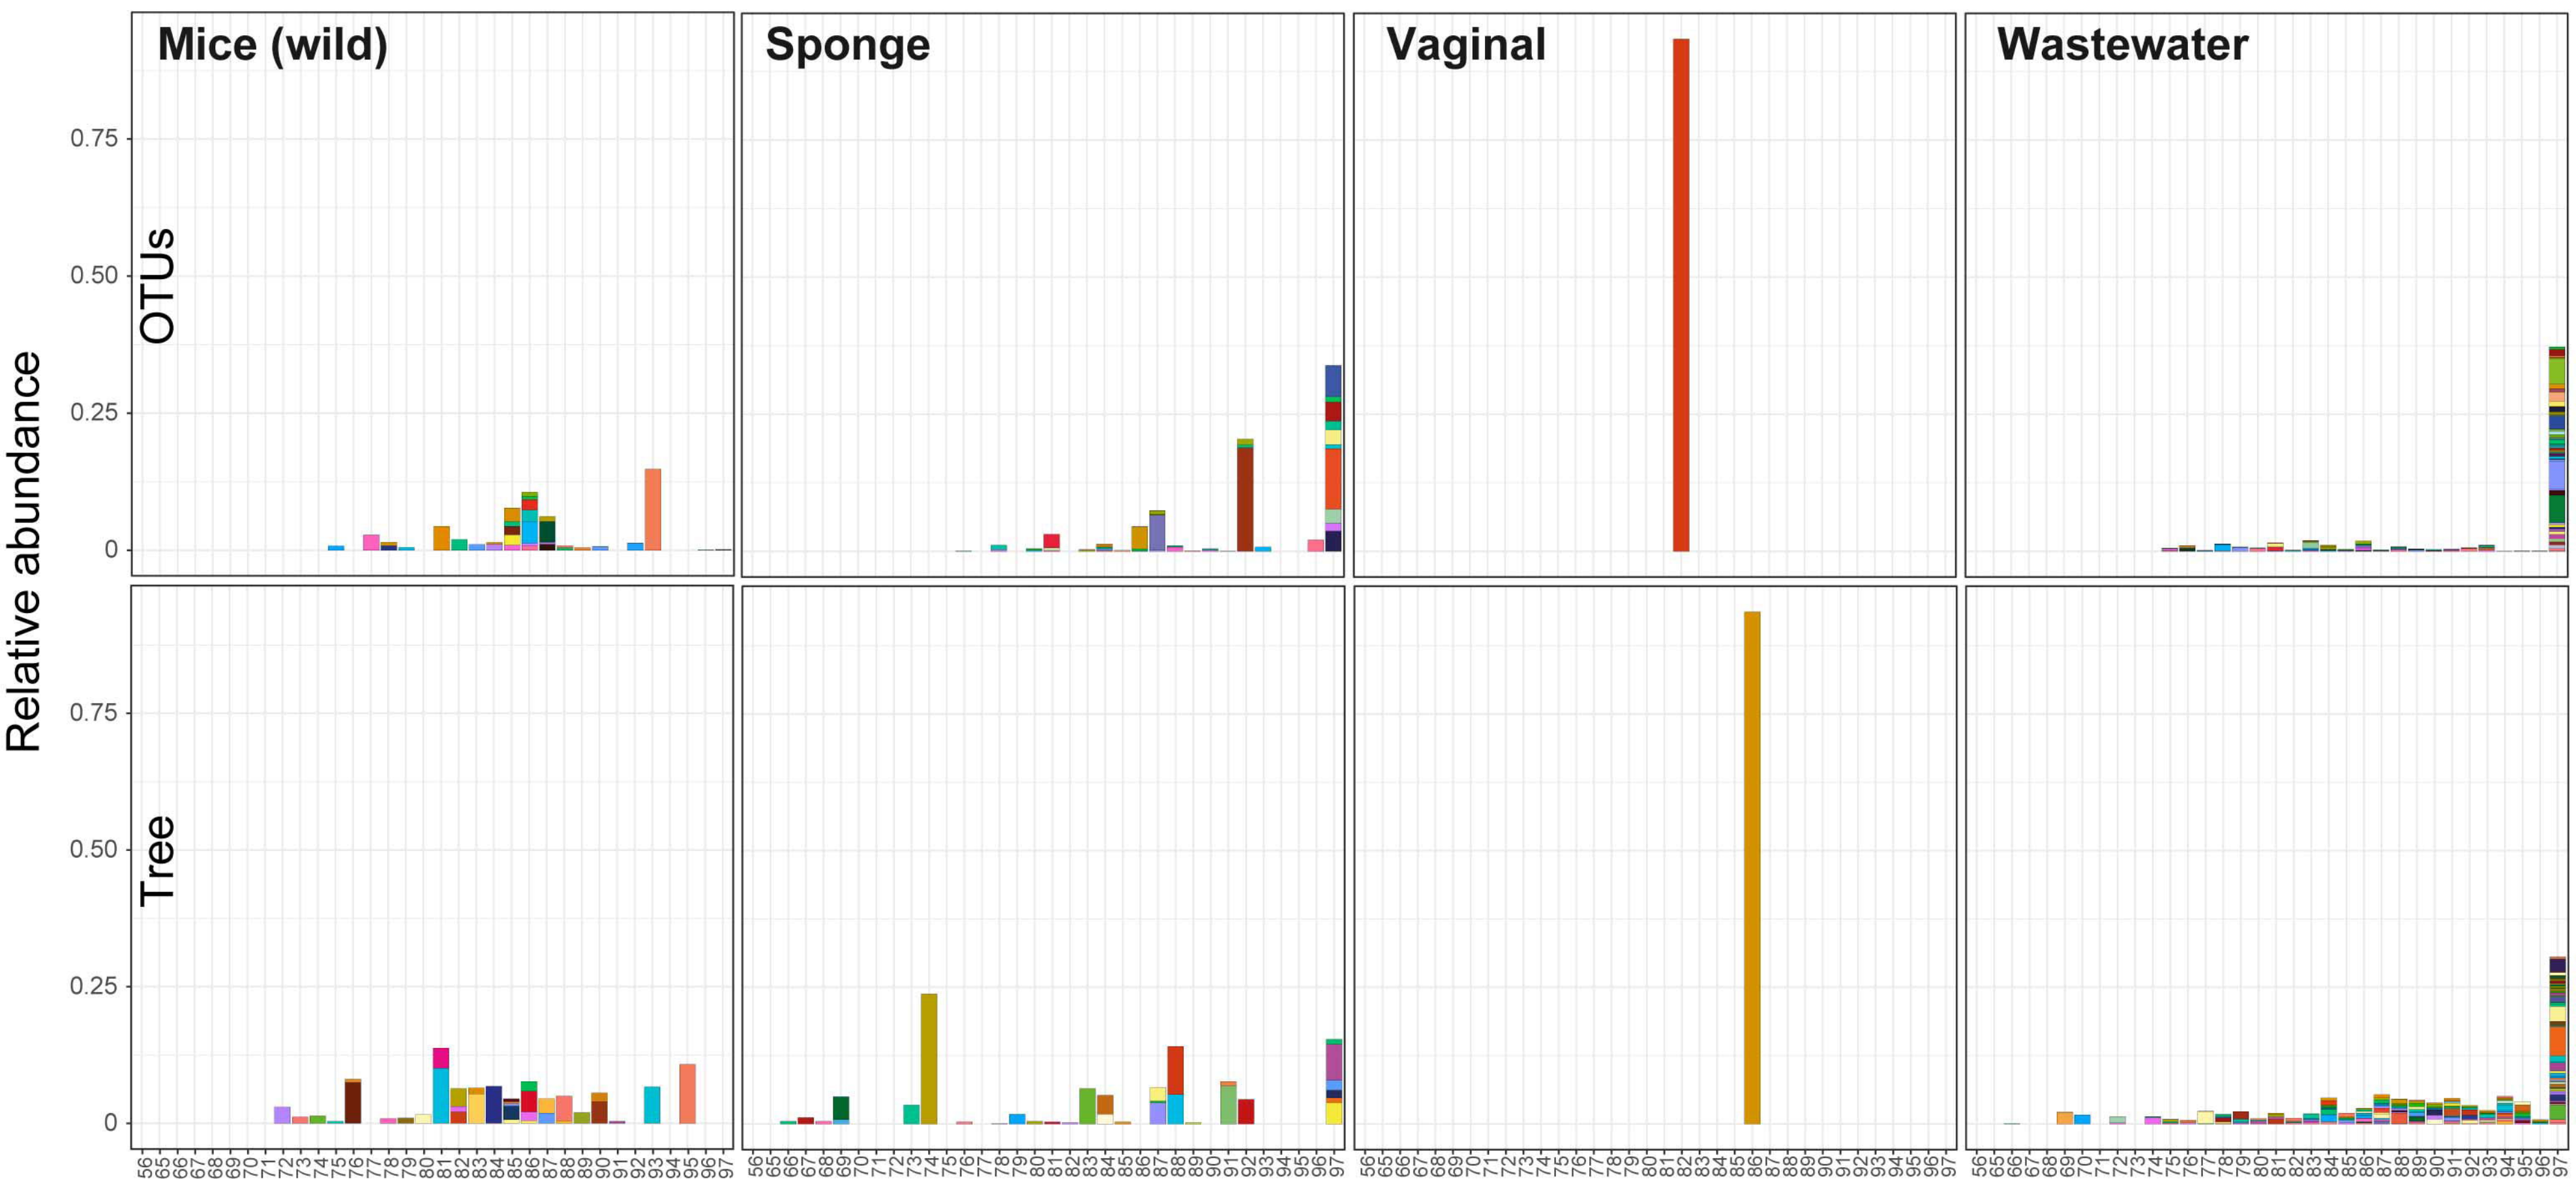

Source: https://www.biorxiv.org/content/10.1101/2020.01.07.896985v1.full.pdf
